# Supplementary material for: Highly selective and efficient heavy metal capture with polysulfide intercalated layered double hydroxides
Source: Royal Society of Chemistry journal article supplement (doi:10.1039/c4ta01203h), 2014-01-01
Supplement: c4ta01203h1.pdf [file c4ta01203h1.pdf]

## Electronic Supplementary Information

# Highly Selective and Efficient Heavy Metal Capture with Polysulfide Intercalated Layered Double Hydroxides

Shulan Ma,<sup>a,b</sup> Qingmei Chen,<sup>a</sup> Hao Li,<sup>b</sup> Pengli Wang,<sup>b</sup> Saiful M. Islam,<sup>b</sup> Qingyang Gu,<sup>a</sup>  
Xiaojing Yang<sup>a</sup> and Mercouri G. Kanatzidis<sup>b,\*</sup>

<sup>a</sup> Beijing Key Laboratory of Energy Conversion and Storage Materials, College of Chemistry, Beijing Normal University, Beijing 100875, China

<sup>b</sup> Department of Chemistry, Northwestern University, 2145 Sheridan Road, Evanston, IL 60208, USA.

---

\* Corresponding author: Fax: +1-847-491-5937. Tel: +1-847-467-1541. E-mail: m-kanatzidis@northwestern.edu

**Table S1.** Adsorptive capacity and selectivity ( $K_d$ ) toward metal ions (10 ppm) of S<sub>2</sub>-LDH. <sup>a</sup>

| S <sub>2</sub> -LDH    | mixed ions               | Co <sup>2+</sup>                   | Ni <sup>2+</sup> | Cu <sup>2+</sup>    | Zn <sup>2+</sup>    | Ag <sup>2+</sup>    | Pb <sup>2+</sup>    | Cd <sup>2+</sup>    | Hg <sup>2+</sup>    |        |
|------------------------|--------------------------|------------------------------------|------------------|---------------------|---------------------|---------------------|---------------------|---------------------|---------------------|--------|
| 0.005 g                | C <sub>0</sub> (ppm)     | 10.52                              | 10.75            | 10.96               | 10.50               | 11.30               | 11.04               | 7.94                | 9.95                |        |
|                        | C <sub>T</sub> -3h (ppm) | 10.48                              | 10.72            | 4.57                | 10.49               | 0.001               | 9.34                | 7.33                | 0.0008              |        |
|                        | ion capacity<br>(mg/g)   | 0.24                               | 0.18             | 38.34               | 0.06                | 67.79               | 10.20               | 3.66                | 59.70               |        |
|                        | Removal (%)              | 0.38                               | 0.28             | 58.30               | 0.10                | 99.99               | 15.40               | 7.68                | 99.99               |        |
|                        | K <sub>d</sub> (ml/g)    | 22.90                              | 16.79            | 8.4×10 <sup>3</sup> | 5.72                | 6.8×10 <sup>7</sup> | 1.1×10 <sup>3</sup> | 499                 | 7.5×10 <sup>7</sup> |        |
|                        | Selectivity order        | Pb < Cu < Ag, Hg                   |                  |                     |                     |                     |                     |                     |                     |        |
| 0.01 g                 | C <sub>T</sub> -3h (ppm) | 10.45                              | 10.69            | 0.077               | 8.985               | 0.001               | 0.67                | 0.24                | 0.0008              |        |
|                        | ion capacity<br>(mg/g)   | 0.21                               | 0.18             | 32.65               | 4.55                | 33.90               | 31.11               | 23.10               | 29.85               |        |
|                        | Removal (%)              | 0.67                               | 0.56             | 99.30               | 14.43               | 99.99               | 93.93               | 96.98               | 99.99               |        |
|                        | K <sub>d</sub> (ml/g)    | 20                                 | 17               | 4.2×10 <sup>5</sup> | 506                 | 3.4×10 <sup>7</sup> | 4.6×10 <sup>4</sup> | 9.6×10 <sup>4</sup> | 3.7×10 <sup>7</sup> |        |
|                        | Selectivity order        | Cd, Pb < Cu < Ag, Hg               |                  |                     |                     |                     |                     |                     |                     |        |
|                        | 0.02 g                   | C <sub>T</sub> -3h (ppm)           | 9.92             | 10.42               | 0.041               | 0.462               | 0.001               | 0.30                | 0.20                | 0.0008 |
| ion capacity<br>(mg/g) |                          | 0.90                               | 0.50             | 16.38               | 15.06               | 16.95               | 16.10               | 11.61               | 14.92               |        |
| Removal (%)            |                          | 5.70                               | 3.07             | 99.63               | 95.60               | 99.99               | 97.28               | 97.48               | 99.99               |        |
| K <sub>d</sub> (ml/g)  |                          | 91                                 | 48               | 4.0×10 <sup>5</sup> | 3.2×10 <sup>4</sup> | 1.7×10 <sup>7</sup> | 5.4×10 <sup>4</sup> | 5.8×10 <sup>4</sup> | 1.9×10 <sup>7</sup> |        |
| Selectivity order      |                          | Zn < Cd, Pb < Cu < Ag, Hg          |                  |                     |                     |                     |                     |                     |                     |        |
| 0.03 g                 |                          | C <sub>T</sub> -3h (ppm)           | 9.58             | 10.02               | 0.022               | 0.091               | 0.001               | 0.062               | 0.049               | 0.001  |
|                        | ion capacity<br>(mg/g)   | 0.94                               | 0.73             | 10.94               | 10.41               | 11.30               | 10.98               | 7.89                | 9.95                |        |
|                        | Removal (%)              | 8.94                               | 6.79             | 99.80               | 99.13               | 99.99               | 99.44               | 99.38               | 99.99               |        |
|                        | K <sub>d</sub> (ml/g)    | 98                                 | 73               | 5.0×10 <sup>5</sup> | 1.1×10 <sup>5</sup> | 1.1×10 <sup>7</sup> | 1.8×10 <sup>5</sup> | 1.6×10 <sup>5</sup> | 9.9×10 <sup>6</sup> |        |
|                        | Selectivity order        | Co, Ni << Zn, Cd, Pb < Cu < Ag, Hg |                  |                     |                     |                     |                     |                     |                     |        |
|                        | 0.035 g                  | C <sub>T</sub> -3h (ppm)           | 9.43             | 10.10               | 0.006               | 0.152               | 0.001               | 0.006               | 0.008               | 0.0008 |
| ion capacity<br>(mg/g) |                          | 0.93                               | 0.56             | 9.39                | 8.87                | 9.68                | 9.46                | 6.80                | 8.53                |        |

|                   |                                      |      |                     |                     |                     |                     |                     |                     |
|-------------------|--------------------------------------|------|---------------------|---------------------|---------------------|---------------------|---------------------|---------------------|
| Removal (%)       | 10.36                                | 6.05 | 99.95               | 98.55               | 99.99               | 99.95               | 99.90               | 99.99               |
| Kd (ml/g)         | 99                                   | 55   | 1.6×10 <sup>6</sup> | 5.8×10 <sup>3</sup> | 9.7×10 <sup>6</sup> | 1.6×10 <sup>6</sup> | 8.5×10 <sup>5</sup> | 1.1×10 <sup>7</sup> |
| Selectivity order | Co, Ni, << Zn < Cd < Pb, Cu < Ag, Hg |      |                     |                     |                     |                     |                     |                     |

<sup>a</sup> concentration: ~10 ppm each cation in the mixed solution, V: 30 ml, mass: 0.005 g-0.035 g.

The V/m ratios are: 860, 1500, 3000, 6000 mL/g.

Adsorption time: 3 h.

**Table S2.** Adsorptive capacity of S<sub>4</sub>-LDH toward 2.5 mM metal ions. <sup>a</sup>

| Ions                    | C <sub>0</sub>   |       | C <sub>f</sub> (after one day) |       | ion capacity<br>(mg/g) | Removal<br>(%) | K <sub>d</sub> |                     |
|-------------------------|------------------|-------|--------------------------------|-------|------------------------|----------------|----------------|---------------------|
|                         | mM               | ppm   | mM                             | ppm   |                        |                |                |                     |
| Mixed ions <sup>a</sup> | Co <sup>2+</sup> | 2.236 | 131.70                         | 2.038 | 121.51                 | 10             | 7.74           | 42                  |
|                         | Ni <sup>2+</sup> | 2.309 | 135.54                         | 2.002 | 114.70                 | 21             | 15.37          | 91                  |
|                         | Cu <sup>2+</sup> | 2.720 | 172.72                         | 0.002 | 0.32                   | 172            | 99.82          | 2.7×10 <sup>5</sup> |
|                         | Zn <sup>2+</sup> | 2.388 | 156.18                         | 1.641 | 109.02                 | 47             | 30.19          | 216                 |
| Mixed ions <sup>b</sup> | Ag <sup>+</sup>  | 2.354 | 254.00                         | 0.001 | 0.11                   | 254            | 99.96          | 1.2×10 <sup>6</sup> |
|                         | Pb <sup>2+</sup> | 2.327 | 482.15                         | 1.965 | 406.11                 | 76             | 15.77          | 94                  |
|                         | Cd <sup>2+</sup> | 2.653 | 298.20                         | 2.456 | 276.05                 | 22             | 7.43           | 40                  |
|                         | Hg <sup>2+</sup> | 2.200 | 441.32                         | 0.001 | 0.20                   | 441            | 99.95          | 1.1×10 <sup>6</sup> |

<sup>a</sup> ~ mixed solution of Co<sup>2+</sup>, Ni<sup>2+</sup>, Cu<sup>2+</sup> and Zn<sup>2+</sup> (~2.5 mM per ion)

<sup>b</sup> ~ mixed solution of Ag<sup>+</sup>, Pb<sup>2+</sup>, Cd<sup>2+</sup> and Hg<sup>2+</sup> (~2.5 mM per ion).

V, 10 ml; m, 0.02 g; V/m ratio, 10 / 0.02 = 500.

Adsorption time: 1 d.
